# Supplementary material
Source: PubMed Central journal article supplement (PMC2904003)
Supplement: supp_51_7_3372__1.pdf [file supp_51_7_3372__1.pdf]

Supplementary table S1. Primers used for real-time PCR

| <b>Primer name</b> | <b>Sequence (5' - 3')</b> | <b>Tm °C</b> | <b>Amplicon (bp)</b> |
|--------------------|---------------------------|--------------|----------------------|
| Mm Zeb1 LP         | TGGCAAGACAACGTGAAAGA      | 60           | 200                  |
| Mm Zeb1 RP         | AACTGGGAAAATGCATCTGG      | 60           |                      |
| Mm TAZ LP          | CCGGGTGGGAGATGACCTT       | 59.3         | 121                  |
| Mm TAZ RP          | AGTTTCACATGATTCAGAGGCT    | 56.1         |                      |
| Mm YAP LP          | GTCCTCCTTTGAGATCCCTGA     | 55.8         | 109                  |
| Mm YAP RP          | TGTTGTTGTCTGATCGTTGTGAT   | 54.8         |                      |
| Mm MITF LP         | TTGATGGATCCGGCCTTGCAAATG  | 60.3         | 135                  |
| Mm MITF RP         | TATGTTGGGAAGGTTGGCTGGACA  | 60.5         |                      |
| Mm Tyr LP          | AGTCGTATCTGGCCATGGCTTCTT  | 60.3         | 172                  |
| Mm Tyr RP          | ACAGCAAGCTGTGGTAGTCGTCTT  | 60.4         |                      |
| Mm Tyrp1 LP        | ATACTGGGACCAGATGGCAACACA  | 60.3         | 154                  |
| Mm Tyrp1 RP        | AAGCGGGTCCTTCGTGAGAGAAAT  | 60.3         |                      |
| Mm RPE65 LP        | TGGATCTCTGTTGCTGGAAAGGGT  | 60.3         | 113                  |
| Mm RPE65 RP        | AGGCTGAGGAGCCTTCATAGCATT  | 60.2         |                      |
| Mm ACTB LP         | GGCTGTATTCCCCTCCATCG      | 57.6         | 154                  |
| Mm ACTB RP         | CCAGTTGGTAACAATGCCATGT    | 55.9         |                      |

Primers used for ChIP assay PCR

| <b>Primer name</b> | <b>Sequence (5' - 3')</b> | <b>Tm °C</b> | <b>Amplicon (bp)</b> |
|--------------------|---------------------------|--------------|----------------------|
| Mm Zeb1 PRMT LP    | AGCACTATTCTCCGCTACTCCAC   | 58.2         | 193                  |
| Mm Zeb1 PRMT RP    | ACCGCACCTGGTTTACGACACTC   | 61.3         |                      |
