# Supplementary material
Source: PubMed Central journal article supplement (PMC2904003)
Supplement: supp_51_7_3372__2.pdf [file supp_51_7_3372__2.pdf]

Liu et al. Supplementary Figure S1

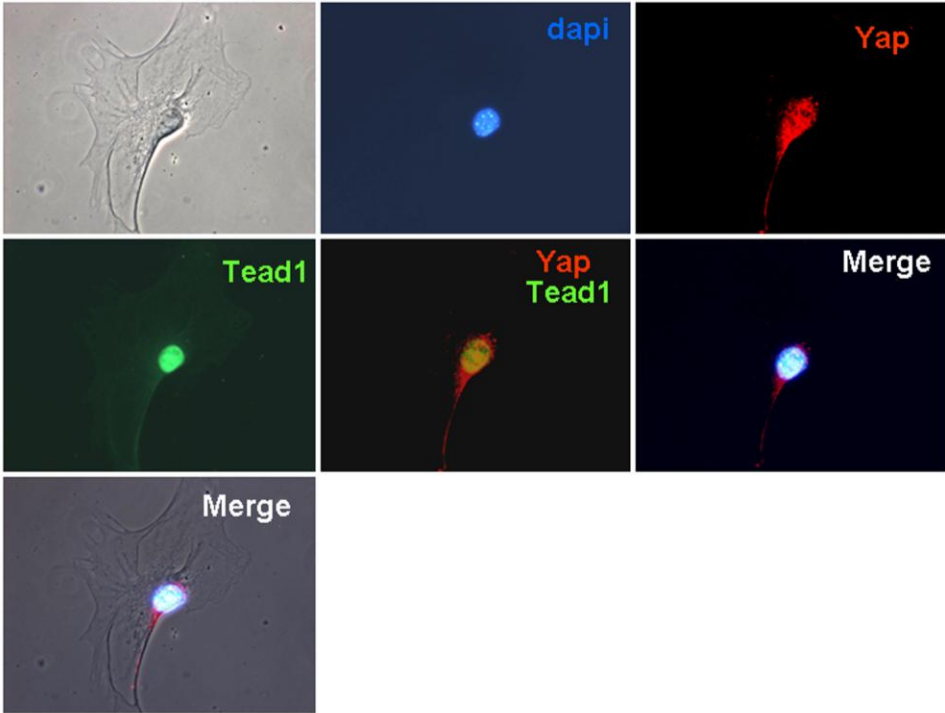

Immunostaining of mouse embryo fibroblast for Yap and Tead1 as described in Materials and Methods. The Yap antibody was from Cell Signaling (4912) and was used at 1:50 dilution.
